# Supplementary material
Source: PubMed Central journal article supplement (PMC7438237)
Supplement: NIHMS1562373-supplement-1.pdf [file NIHMS1562373-supplement-1.pdf]

Online Supporting Material

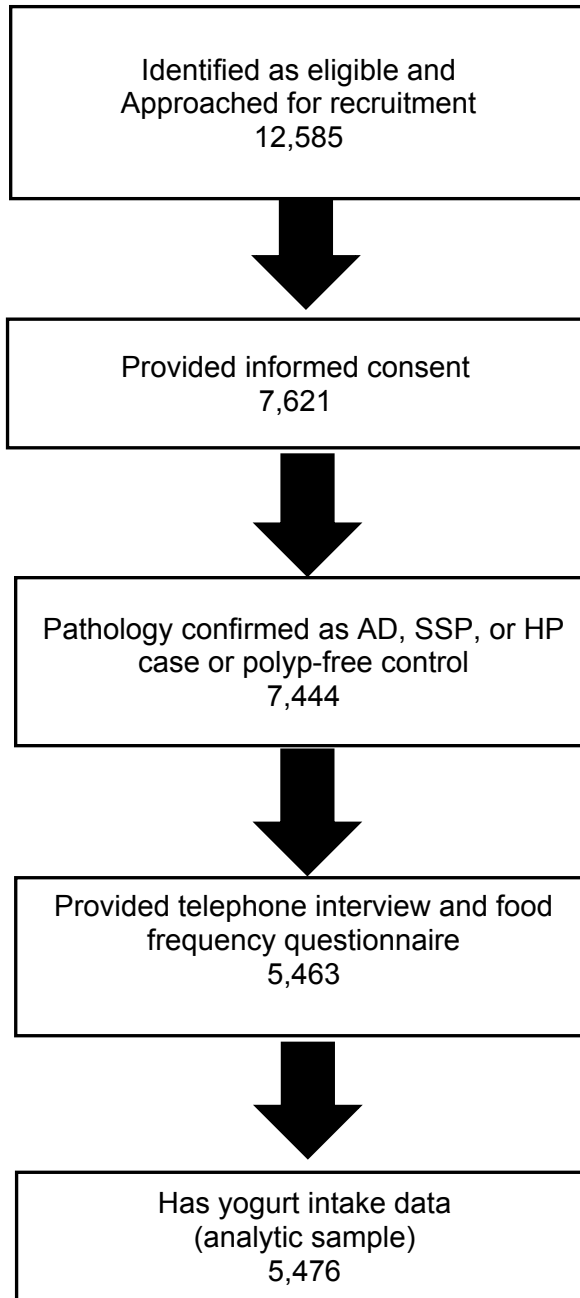

Supplementary Figure 1. Tennessee Colorectal Polyp Study Participant Flowchart

Online Supporting Material

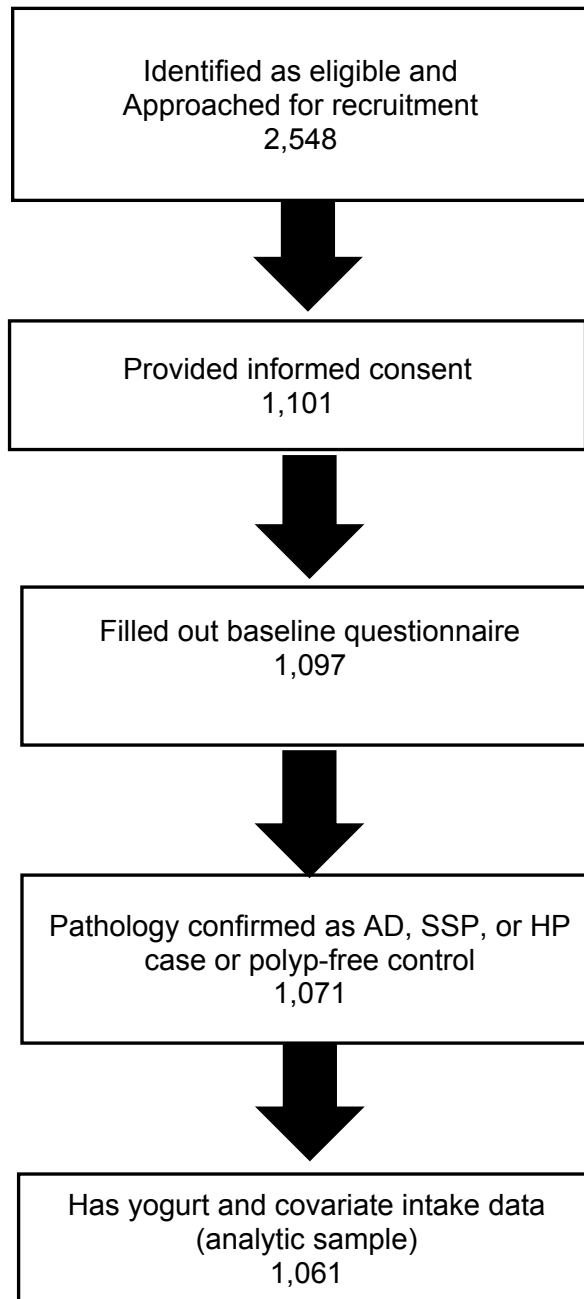

Supplementary Figure 2. Biofilm Study Participant Flowchart

## Online Supporting Material

Supplementary Table 1. Associations between yogurt consumption and probiotic use with risk of colorectal polyps using classification by all adenomatous polyps and all serrated polyps (HP, SSP).

| Frequency of yogurt intake                          | Case-Control Comparisons |                         |                           |              |                 | Case-Case Comparisons |                 |                 |                 |                 |      |
|-----------------------------------------------------|--------------------------|-------------------------|---------------------------|--------------|-----------------|-----------------------|-----------------|-----------------|-----------------|-----------------|------|
|                                                     | n                        | n                       | OR (95% CI)               | n            | OR (95% CI)     | n                     | OR (95% CI)     | OR (95% CI)     | OR (95% CI)     | OR (95% CI)     |      |
|                                                     | No Polyp Controls        | Adenomatous Polyps (AP) | Serrated Polyps Only (SP) | Both SP + AP | SP vs. AP       | SP+AP vs. AP          | SP+AP vs. SP    |                 |                 |                 |      |
| <b>Tennessee Colorectal Polyp Study<sup>a</sup></b> |                          |                         |                           |              |                 |                       |                 |                 |                 |                 |      |
| <b>ALL</b>                                          |                          |                         |                           |              |                 |                       |                 |                 |                 |                 |      |
| Never/Rarely                                        | 1581                     | 715                     | 1.00 (ref)                | 320          | 1.00 (ref)      | 256                   | 1.00 (ref)      | 1.00 (ref)      | 1.00 (ref)      | 1.00 (ref)      |      |
| Monthly Less than Weekly                            | 591                      | 204                     | 1.00(0.82-1.23)           | 102          | 1.01(0.78-1.32) | 55                    | 0.86(0.61-1.21) | 1.01(0.75-1.36) | 0.86(0.59-1.23) | 0.85(0.57-1.27) |      |
| Weekly Less than Daily                              | 845                      | 237                     | 0.91(0.74-1.10)           | 128          | 0.99(0.77-1.28) | 69                    | 0.97(0.70-1.35) | 1.1(0.82-1.47)  | 1.07(0.76-1.53) | 0.98(0.67-1.45) |      |
| Daily                                               | 241                      | 73                      | 1.03(0.76-1.39)           | 20           | 0.56(0.34-0.93) | 10                    | 0.38(0.17-0.84) | 0.55(0.32-0.95) | 0.37(0.16-0.84) | 0.68(0.27-1.68) |      |
| <b>P<sub>trend</sub></b>                            |                          |                         | 0.58                      |              | 0.19            |                       | 0.11            |                 | 0.42            | 0.22            | 0.61 |
| <b>MALES</b>                                        |                          |                         |                           |              |                 |                       |                 |                 |                 |                 |      |
| Never/Rarely                                        | 1129                     | 588                     | 1.00 (ref)                | 247          | 1.00 (ref)      | 211                   | 1.00 (ref)      | 1.00 (ref)      | 1.00 (ref)      | 1.00 (ref)      |      |
| Monthly Less than Weekly                            | 288                      | 123                     | 1.00(0.78-1.28)           | 51           | 0.91(0.64-1.30) | 32                    | 0.73(0.47-1.14) | 0.92(0.62-1.35) | 0.74(0.46-1.17) | 0.8(0.48-1.35)  |      |
| Weekly Less than Daily                              | 286                      | 118                     | 1.01(0.78-1.31)           | 50           | 1.01(0.71-1.45) | 47                    | 1.38(0.94-2.04) | 1(0.67-1.49)    | 1.37(0.9-2.08)  | 1.36(0.84-2.21) |      |
| Daily                                               | 77                       | 42                      | 1.40(0.92-2.12)           | 6            | 0.37(0.15-0.95) | 4                     | 0.34(0.10-1.10) | 0.27(0.10-0.70) | 0.24(0.07-0.80) | 0.9(0.21-3.87)  |      |
| <b>P<sub>trend</sub></b>                            |                          |                         | 0.34                      |              | 0.25            |                       | 0.94            |                 | 0.09            | 0.54            | 0.44 |
| <b>FEMALES</b>                                      |                          |                         |                           |              |                 |                       |                 |                 |                 |                 |      |
| Never/Rarely                                        | 452                      | 127                     | 1.00 (ref)                | 73           | 1.00 (ref)      | 45                    | 1.00 (ref)      | 1.00 (ref)      | 1.00 (ref)      | 1.00 (ref)      |      |
| Monthly Less than Weekly                            | 303                      | 81                      | 0.95(0.68-1.33)           | 51           | 1.17(0.77-1.77) | 23                    | 0.98(0.55-1.75) | 1.22(0.75-1.99) | 1.03(0.55-1.92) | 0.84(0.43-1.64) |      |
| Weekly Less than Daily                              | 559                      | 119                     | 0.77(0.56-1.04)           | 78           | 1.04(0.7-1.52)  | 22                    | 0.54(0.3-0.99)  | 1.35(0.86-2.13) | 0.71(0.37-1.36) | 0.53(0.27-1.04) |      |
| Daily                                               | 164                      | 31                      | 0.71(0.44-1.13)           | 14           | 0.75(0.4-1.42)  | 6                     | 0.39(0.13-1.14) | 1.06(0.51-2.24) | 0.55(0.17-1.72) | 0.51(0.15-1.74) |      |
| <b>P<sub>trend</sub></b>                            |                          |                         | 0.05                      |              | 0.63            |                       | 0.02            |                 | 0.36            | 0.20            | 0.07 |
| <b>Johns Hopkins Biofilm Study<sup>b</sup></b>      |                          |                         |                           |              |                 |                       |                 |                 |                 |                 |      |
| <b>ALL</b>                                          |                          |                         |                           |              |                 |                       |                 |                 |                 |                 |      |

Online Supporting Material

|                          |                          |     |                   |     |                   |    |                   |                   |                   |                    |
|--------------------------|--------------------------|-----|-------------------|-----|-------------------|----|-------------------|-------------------|-------------------|--------------------|
| Never/Rarely             | 196                      | 118 | 1.00 (ref)        | 42  | 1.00 (ref)        | 35 | 1.00 (ref)        | 1.00 (ref)        | 1.00 (ref)        | 1.00 (ref)         |
| 1 or more/month          | 110                      | 57  | 0.94 (0.62, 1.42) | 29  | 1.48 (0.85, 2.58) | 25 | 1.50 (0.82, 2.72) | 1.58 (0.87, 2.88) | 1.60 (0.85, 3.00) | 1.01 (0.49, 2.09)  |
| 1 or more/week           | 271                      | 104 | 0.74 (0.52, 1.05) | 54  | 1.02 (0.63, 1.65) | 28 | 0.71 (0.40, 1.24) | 1.38 (0.82, 2.33) | 0.96 (0.53, 1.73) | 0.69 (0.35, 1.36)  |
| <b>P<sub>trend</sub></b> |                          |     | 0.08              |     | 1.00              |    | 0.23              | 0.23              | 0.93              | 0.31               |
| <b>MALES</b>             |                          |     |                   |     |                   |    |                   |                   |                   |                    |
| Never/Rarely             | 106                      | 75  | 1.00 (ref)        | 18  | 1.00 (ref)        | 25 | 1.00 (ref)        | 1.00 (ref)        | 1.00 (ref)        | 1.00 (ref)         |
| 1 or more/month          | 34                       | 30  | 1.25 (0.68, 2.32) | 13  | 2.94 (1.25, 6.93) | 13 | 1.75 (0.76, 4.04) | 2.35 (0.97, 5.70) | 1.40 (0.60, 3.24) | 0.60 (0.21, 1.69)  |
| 1 or more/week           | 93                       | 44  | 0.71 (0.43, 1.18) | 22  | 1.77 (0.84, 3.72) | 9  | 0.44 (0.19, 1.03) | 2.49 (1.13, 5.50) | 0.61 (0.25, 1.49) | 0.25 (0.09, 0.71)  |
| <b>P<sub>trend</sub></b> |                          |     | 0.21              |     | 0.12              |    | 0.09              | 0.02              | 0.40              | 0.01               |
| <b>FEMALES</b>           |                          |     |                   |     |                   |    |                   |                   |                   |                    |
| Never/Rarely             | 90                       | 43  | 1.00 (ref)        | 24  | 1.00 (ref)        | 10 | 1.00 (ref)        | 1.00 (ref)        | 1.00 (ref)        | 1.00 (ref)         |
| 1 or more/month          | 76                       | 27  | 0.72 (0.39, 1.31) | 16  | 0.85 (0.40, 1.79) | 12 | 1.46 (0.57, 3.75) | 1.18 (0.51, 2.72) | 2.03 (0.75, 5.55) | 1.73 (0.58, 5.13)  |
| 1 or more/week           | 178                      | 60  | 0.66 (0.40, 1.10) | 32  | 0.60 (0.32, 1.14) | 19 | 1.01 (0.42, 2.39) | 0.91 (0.45, 1.86) | 1.51 (0.61, 3.77) | 1.67 (0.62, 4.47)  |
| <b>P<sub>trend</sub></b> |                          |     | 0.12              |     | 0.11              |    | 0.91              | 0.77              | 0.43              | 0.34               |
| <b>Probiotic use</b>     | <b>No Polyp Controls</b> |     |                   |     |                   |    |                   |                   |                   |                    |
| <b>ALL</b>               |                          |     |                   |     |                   |    |                   |                   |                   |                    |
| Yes                      | 119                      | 42  | 0.80 (0.53, 1.21) | 20  | 0.78 (0.46, 1.35) | 10 | 0.64 (0.31, 1.31) | 0.98 (0.53, 1.79) | 0.80 (0.37, 1.70) | 0.82 (0.35, 1.89)  |
| No                       | 458                      | 237 | 1.00 (ref)        | 105 | 1.00 (ref)        | 78 | 1.00 (ref)        | 1.00 (ref)        | 1.00 (ref)        | 1.00 (ref)         |
| <b>MALES</b>             |                          |     |                   |     |                   |    |                   |                   |                   |                    |
| Yes                      | 27                       | 17  | 1.15 (0.57, 2.31) | 2   | 0.31 (0.07, 1.40) | 6  | 1.56 (0.56, 4.32) | 0.27 (0.06, 1.27) | 1.36 (0.47, 3.92) | 4.99 (0.91, 27.47) |
| No                       | 206                      | 132 | 1.00 (ref)        | 51  | 1.00 (ref)        | 41 | 1.00 (ref)        | 1.00 (ref)        | 1.00 (ref)        | 1.00 (ref)         |
| <b>FEMALES</b>           |                          |     |                   |     |                   |    |                   |                   |                   |                    |
| Yes                      | 92                       | 25  | 0.66 (0.39, 1.12) | 18  | 1.00 (0.54, 1.87) | 4  | 0.34 (0.11, 1.00) | 1.51 (0.73, 3.13) | 0.51 (0.16, 1.59) | 0.34 (0.10, 1.10)  |
| No                       | 254                      | 105 | 1.00 (ref)        | 54  | 1.00 (ref)        | 37 | 1.00 (ref)        | 1.00 (ref)        | 1.00 (ref)        | 1.00 (ref)         |

<sup>a</sup> Adjusted for sex, study location, age, regular alcohol drinking status, BMI, smoking status, physical activity in the past 10 years, educational attainment, NSAID use, red meat intake, dietary energy intake, and frequency of non-yogurt dairy intake

<sup>b</sup> Adjusted for sex, age, cigarette use (current/former/never), overweight (BMI less than or greater than 25 kg/m<sup>2</sup>), prior colon polyp (yes/no), history of GI surgery (yes/no), history of cholecystectomy (yes/no), diabetes mellitus diagnosis (yes/no), hypertension diagnosis (yes/no), and hyperlipidemia diagnosis (yes/no).

## Online Supporting Material

**Supplementary Table 2.** Associations between yogurt consumption and probiotic use with risk of colorectal polyps using classification by anatomical location of polyps.

| Frequency of yogurt intake                          | Case-Control Comparisons |           |                          |            |                          |            | Case-Case Comparisons    |                          |                          |                          |
|-----------------------------------------------------|--------------------------|-----------|--------------------------|------------|--------------------------|------------|--------------------------|--------------------------|--------------------------|--------------------------|
|                                                     | n                        | n         | OR (95% CI) <sup>a</sup> | n          | OR (95% CI) <sup>a</sup> | n          | OR (95% CI) <sup>a</sup> |
|                                                     | No Polyp Controls        | LEFT ONLY |                          | RIGHT ONLY |                          | BOTH SIDES |                          | Right vs Left            | Both vs Left             | Right vs Both            |
| <b>Tennessee Colorectal Polyp Study<sup>a</sup></b> |                          |           |                          |            |                          |            |                          |                          |                          |                          |
| <b>ALL</b>                                          |                          |           |                          |            |                          |            |                          |                          |                          |                          |
| Never/Rarely                                        | 1581                     | 673       | 1.00 (ref)               | 319        | 1.00 (ref)               | 286        | 1.00 (ref)               | 1.00 (ref)               | 1.00 (ref)               | 1.00 (ref)               |
| Monthly Less than Weekly                            | 591                      | 178       | 0.95(0.77-1.17)          | 112        | 1.1(0.85-1.42)           | 66         | 0.92(0.67-1.27)          | 1.16(0.86-1.56)          | 0.97(0.69-1.38)          | 0.84(0.57-1.22)          |
| Weekly Less than Daily                              | 845                      | 200       | 0.87(0.71-1.07)          | 149        | 1.06(0.83-1.36)          | 76         | 0.88(0.64-1.2)           | 1.23(0.92-1.64)          | 1.01(0.71-1.43)          | 0.82(0.57-1.2)           |
| Daily                                               | 241                      | 40        | 0.56(0.38-0.83)          | 45         | 1.21(0.84-1.76)          | 17         | 0.77(0.44-1.33)          | 2.15(1.31-3.52)          | 1.36(0.72-2.56)          | 0.63(0.34-1.18)          |
| <b>P<sub>trend</sub></b>                            |                          |           | 0.01                     |            | 0.35                     |            | 0.25                     | 0.008                    | 0.62                     | 0.11                     |
| <b>MALES</b>                                        |                          |           |                          |            |                          |            |                          |                          |                          |                          |
| Never/Rarely                                        | 1129                     | 547       | 1.00 (ref)               | 251        | 1.00 (ref)               | 235        | 1.00 (ref)               | 1.00 (ref)               | 1.00 (ref)               | 1.00 (ref)               |
| Monthly Less than Weekly                            | 288                      | 96        | 0.87(0.66-1.14)          | 64         | 1.09(0.79-1.50)          | 42         | 0.92(0.62-1.35)          | 1.26(0.86-1.83)          | 1.06(0.69-1.62)          | 0.84(0.53-1.34)          |
| Weekly Less than Daily                              | 286                      | 91        | 0.96(0.72-1.27)          | 75         | 1.23(0.89-1.69)          | 43         | 1.07(0.72-1.59)          | 1.28(0.88-1.87)          | 1.12(0.73-1.73)          | 0.87(0.55-1.39)          |
| Daily                                               | 77                       | 20        | 0.69(0.39-1.20)          | 24         | 1.66(1.00-2.75)          | 8          | 0.71(0.31-1.60)          | 2.42(1.24-4.72)          | 1.03(0.41-2.57)          | 0.42(0.17-1.04)          |
| <b>P<sub>trend</sub></b>                            |                          |           | 0.26                     |            | 0.04                     |            | 0.77                     | 0.01                     | 0.65                     | 0.11                     |
| <b>FEMALES</b>                                      |                          |           |                          |            |                          |            |                          |                          |                          |                          |
| Never/Rarely                                        | 452                      | 126       | 1.00 (ref)               | 68         | 1.00 (ref)               | 51         | 1.00 (ref)               | 1.00 (ref)               | 1.00 (ref)               | 1.00 (ref)               |
| Monthly Less than Weekly                            | 303                      | 82        | 1.05(0.75-1.46)          | 48         | 1.07(0.71-1.62)          | 24         | 0.83(0.47-1.46)          | 1.02(0.63-1.66)          | 0.8(0.43-1.47)           | 0.78(0.4-1.51)           |
| Weekly Less than Daily                              | 559                      | 109       | 0.8(0.58-1.1)            | 74         | 0.88(0.6-1.29)           | 33         | 0.71(0.41-1.22)          | 1.1(0.69-1.74)           | 0.88(0.49-1.6)           | 0.8(0.43-1.52)           |
| Daily                                               | 164                      | 20        | 0.48(0.28-0.85)          | 21         | 0.88(0.5-1.56)           | 9          | 0.83(0.38-1.84)          | 1.82(0.86-3.86)          | 1.72(0.68-4.34)          | 0.95(0.37-2.42)          |
| <b>P<sub>trend</sub></b>                            |                          |           | 0.01                     |            | 0.46                     |            | 0.29                     | 0.27                     | 0.71                     | 0.64                     |
| <b>Johns Hopkins Biofilm Study<sup>b</sup></b>      |                          |           |                          |            |                          |            |                          |                          |                          |                          |
|                                                     | No Polyp Controls        | LEFT ONLY |                          | RIGHT ONLY |                          | BOTH SIDES |                          | Right vs Left            | Both vs Left             | Right vs Both            |
| <b>ALL</b>                                          |                          |           |                          |            |                          |            |                          |                          |                          |                          |

Online Supporting Material

|                                                     |     |    |                   |    |                   |    |                   |                   |                   |                   |
|-----------------------------------------------------|-----|----|-------------------|----|-------------------|----|-------------------|-------------------|-------------------|-------------------|
| DOES NOT EAT<br>YOGURT/RARELY<br>1 OR<br>MORE/MONTH | 196 | 61 | 1.00 (ref)        | 81 | 1.00 (ref)        | 51 | 1.00 (ref)        | 1.00 (ref)        | 1.00 (ref)        | 1.00 (ref)        |
| 1 OR MORE/WEEK                                      | 271 | 74 | 0.99 (0.65, 1.50) | 73 | 0.70 (0.48, 1.04) | 38 | 0.75 (0.46, 1.25) | 0.71 (0.43, 1.16) | 0.76 (0.43, 1.36) | 0.93 (0.53, 1.63) |
| <b>P<sub>trend</sub></b>                            |     |    | 0.92              |    | 0.07              |    | 0.28              |                   | 0.17              | 0.38              |
| MALES                                               |     |    |                   |    |                   |    |                   |                   |                   |                   |
| DOES NOT EAT<br>YOGURT/RARELY<br>1 OR<br>MORE/MONTH | 106 | 29 | 1.00 (ref)        | 50 | 1.00 (ref)        | 39 | 1.00 (ref)        | 1.00 (ref)        | 1.00 (ref)        | 1.00 (ref)        |
| 1 OR MORE/WEEK                                      | 93  | 31 | 1.41 (0.76, 2.60) | 25 | 0.59 (0.33, 1.06) | 18 | 0.58 (0.29, 1.17) | 0.42 (0.20, 0.88) | 0.41 (0.18, 0.93) | 1.02 (0.46, 2.24) |
| <b>P<sub>trend</sub></b>                            |     |    | 0.26              |    | 0.11              |    | 0.15              |                   | 0.03              | 0.04              |
| FEMALES                                             |     |    |                   |    |                   |    |                   |                   |                   |                   |
| DOES NOT EAT<br>YOGURT/RARELY<br>1 OR<br>MORE/MONTH | 91  | 32 | 1.00 (ref)        | 31 | 1.00 (ref)        | 12 | 1.00 (ref)        | 1.00 (ref)        | 1.00 (ref)        | 1.00 (ref)        |
| 1 OR MORE/WEEK                                      | 179 | 43 | 0.66 (0.38, 1.16) | 48 | 0.69 (0.40, 1.20) | 20 | 0.95 (0.41, 2.16) | 1.05 (0.53, 2.07) | 1.43 (0.57, 3.55) | 0.73 (0.25, 1.91) |
| <b>P<sub>trend</sub></b>                            |     |    | 0.15              |    | 0.19              |    | 0.84              |                   | 0.90              | 0.47              |

**Probiotic use**

|         |     |     |                   |     |                    |    |                   |                   |                   |                   |
|---------|-----|-----|-------------------|-----|--------------------|----|-------------------|-------------------|-------------------|-------------------|
| ALL     |     |     |                   |     |                    |    |                   |                   |                   |                   |
| Yes     | 119 | 28  | 0.84 (0.52, 1.34) | 27  | 0.69 (0.43, 1.11)  | 17 | 0.86 (0.47, 1.59) | 0.83 (0.46, 1.50) | 1.03 (0.51, 2.09) | 0.80 (0.39, 1.61) |
| No      | 460 | 145 | 1.00 (ref)        | 172 | 1.00 (ref)         | 99 | 1.00 (ref)        | 1.00 (ref)        | 1.00 (ref)        | 1.00 (ref)        |
| MALES   |     |     |                   |     |                    |    |                   |                   |                   |                   |
| Yes     | 27  | 8   | 1.00 (0.42, 2.37) | 7   | 0.70 (0.29, 1.71)  | 10 | 1.50 (0.61, 3.64) | 0.70 (0.24, 2.08) | 1.50 (0.52, 4.33) | 0.47 (0.16, 1.40) |
| No      | 206 | 69  | 1.00 (ref)        | 91  | 1.00 (ref)         | 63 | 1.00 (ref)        | 1.00 (ref)        | 1.00 (ref)        | 1.00 (ref)        |
| FEMALES |     |     |                   |     |                    |    |                   |                   |                   |                   |
| Yes     | 92  | 20  | 0.80 (0.45, 1.42) | 20  | 0.67 (0.38, 1.18 ) | 7  | 0.56 (0.23, 1.36) | 0.84 (0.41, 1.71) | 0.70 (0.26, 1.88) | 1.19 (0.45, 3.19) |
| No      | 254 | 76  | 1.00 (ref)        | 81  | 1.00 (ref)         | 36 | 1.00 (ref)        | 1.00 (ref)        | 1.00 (ref)        | 1.00 (ref)        |

<sup>a</sup> Adjusted for sex, study location, age, regular alcohol drinking status, BMI, smoking status, physical activity in the past 10 years, educational attainment, NSAID use, red meat intake, dietary energy intake, and frequency of non-yogurt dairy intake

<sup>b</sup> Adjusted for sex, age, cigarette use (current/former/never), overweight (BMI less than or greater than 25 kg/m<sup>2</sup>), prior colon polyp (yes/no), history of GI surgery (yes/no), history of cholecystectomy (yes/no), diabetes mellitus diagnosis (yes/no), hypertension diagnosis (yes/no), and hyperlipidemia diagnosis (yes/no).

## Online Supporting Material

**Supplementary Table 3.** Associations between yogurt consumption and probiotic use with risk of colorectal polyps using classification by advanced versus non-advanced adenoma.

| Frequency of yogurt intake                          | Case-Control Comparisons |     |                          |              |                          |
|-----------------------------------------------------|--------------------------|-----|--------------------------|--------------|--------------------------|
|                                                     | n                        | n   | OR (95% CI) <sup>a</sup> | n            | OR (95% CI) <sup>a</sup> |
|                                                     | No Polyp Controls        |     | Non-Advanced APs         | Advanced APs |                          |
| <b>Tennessee Colorectal Polyp Study<sup>a</sup></b> |                          |     |                          |              |                          |
| Never/Rarely                                        | 1581                     | 682 | 1.00 (ref)               | 279          | 1.00 (ref)               |
| Monthly Less than Weekly                            | 591                      | 177 | 0.90 (0.73-1.12)         | 76           | 1.06 (0.79-1.43)         |
| Weekly Less than Daily                              | 845                      | 225 | 0.94 (0.77-1.15)         | 76           | 0.81 (0.59-1.11)         |
| Daily                                               | 241                      | 61  | 0.92 (0.66-1.27)         | 22           | 0.87 (0.52-1.45)         |
| <b>P<sub>trend</sub></b>                            |                          |     | 0.43                     |              | 0.26                     |
| <b>Johns Hopkins Biofilm Study<sup>b</sup></b>      |                          |     |                          |              |                          |
|                                                     | No Polyp Controls        |     | Non-Advanced APs         | Advanced APs |                          |
| DOES NOT EAT YOGURT/RARELY                          | 197                      | 117 | 1.00 (ref)               | 22           | 1.00 (ref)               |
| 1 OR MORE/MONTH                                     | 110                      | 68  | 1.11 (0.74, 1.66)        | 4            | 0.33 ( 0.10, 1.03)       |
| 1 OR MORE/WEEK                                      | 272                      | 107 | 0.76(0.54, 1.08)         | 15           | 0.66 (0.31, 1.40)        |
| <b>P<sub>trend</sub></b>                            |                          |     | 0.12                     |              | 0.23                     |
| <b>Probiotic use</b>                                |                          |     |                          |              |                          |
| Yes                                                 | 119                      | 40  | 0.66 (0.43, 1.00)        | 7            | 0.86(0.35, 2.06)         |
| No                                                  | 460                      | 252 | 1.00 (ref)               | 34           | 1.00 (ref)               |

<sup>a</sup> Adjusted for sex, study location, age, regular alcohol drinking status, BMI, smoking status, physical activity in the past 10 years, educational attainment, NSAID use, red meat intake, dietary energy intake, and frequency of non-yogurt dairy intake

<sup>b</sup> Adjusted for sex, age, cigarette use (current/former/never), overweight (BMI less than or greater than 25 kg/m<sup>2</sup>), prior colon polyp (yes/no), history of GI surgery (yes/no), history of cholecystectomy (yes/no), diabetes mellitus diagnosis (yes/no), hypertension diagnosis (yes/no), and hyperlipidemia diagnosis (yes/no).
